# Supplementary material for: Comment on “Zero-thermal-quenching and photoluminescence tuning with assistance of carriers from defect cluster traps” by Chen et al., J. Mater. Chem. C, 2018, 6, 10687–10692
Source: Royal Society of Chemistry journal article supplement (doi:10.1039/c9tc01936g), 2019-12-20
Supplement: c9tc01936g1.pdf [file c9tc01936g1.pdf]

**Supporting Information:**

**Comment on “Zero-thermal-quenching and photoluminescence tuning with assistance of carriers from defect cluster traps”**

Yu Xiao,<sup>ab</sup> Zhendong Hao<sup>\*ab</sup>

*1. State Key Laboratory of Luminescence and Applications, Changchun Institute of Optics, Fine Mechanics and Physics, Chinese Academy of Sciences, 3888 Eastern South Lake Road, Changchun 130033, China.*

*2. Center of Materials Science and Optoelectronics Engineering, University of Chinese Academy of Sciences, Beijing 100049, China.*

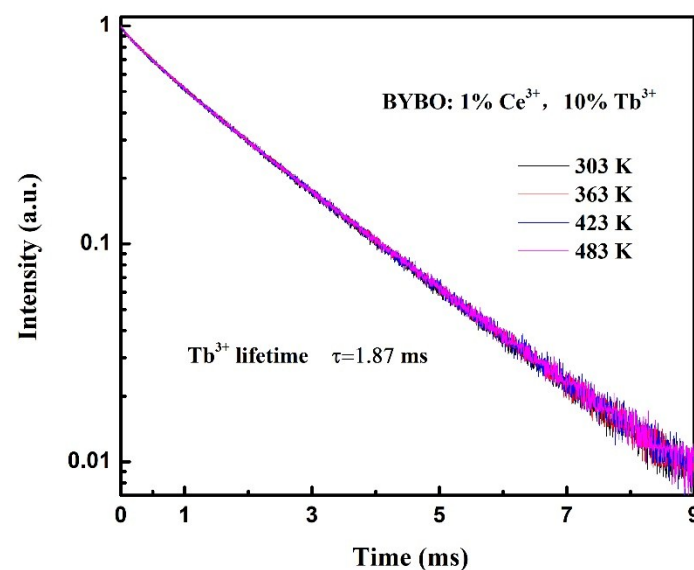

**Fig. S1** Fluorescence decay curves of  $\text{Tb}^{3+}$   $^5\text{D}_4$  transition in BYBO: 1%  $\text{Ce}^{3+}$ , 10%  $\text{Tb}^{3+}$  upon  $\text{Ce}^{3+}$  excitation at 350nm for different temperatures from 303K to 483K

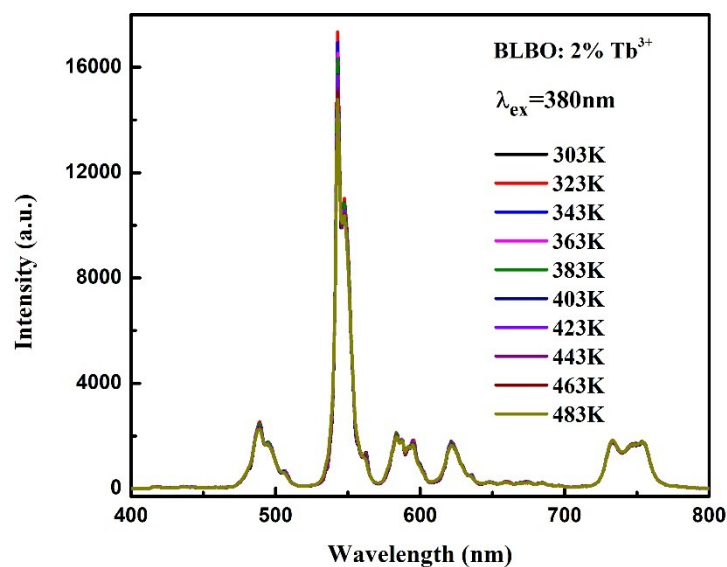

**Fig.S2** Temperature dependent PL spectra of BLBO: 2%  $\text{Tb}^{3+}$  upon 380nm excitation.

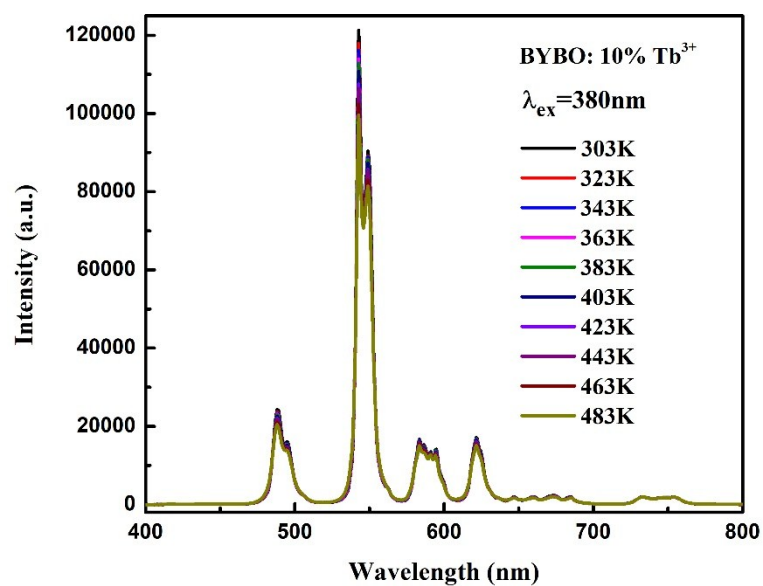

Fig.S3 Temperature dependent PL spectra of BYBO: 10% Tb<sup>3+</sup> upon 380nm excitation.

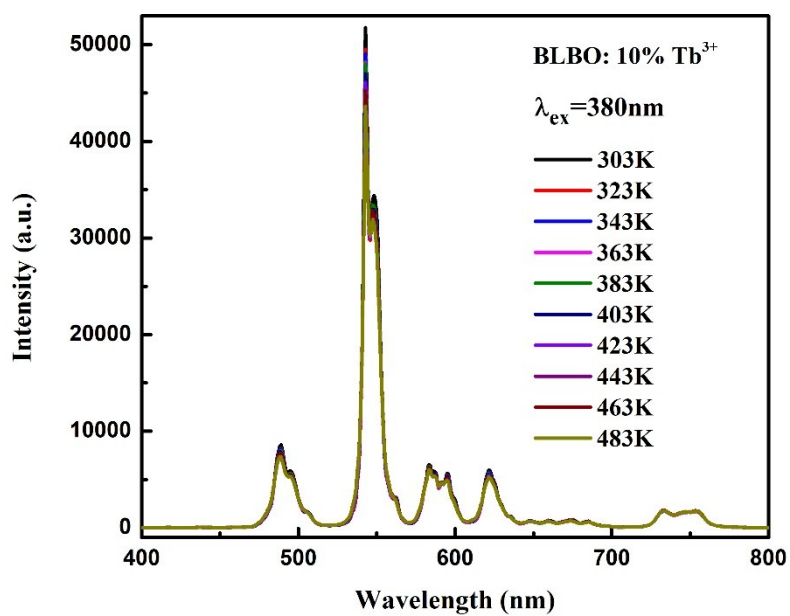

Fig.S4 Temperature dependent PL spectra of BLBO: 10% Tb<sup>3+</sup> upon 380nm excitation.
